# Supplementary material for: Tuning NO coverage promotes ampere-level electrosynthesis of a nylon-6 precursor
Source: Research Square preprint supplement (doi:10.21203/rs.3.rs-4791713/v1), 2025-02-26
Supplement: Supplementary file 1 [file 009c7266729b6b6b72de5934.docx]

Supplementary Information

**Tuning NO coverage promotes ampere-level electrosynthesis of a nylon-6 precursor**

*Wu* *et al*.

**Table of contents**

**Supplementary Figures 1–45**

**Supplementary Notes 1–15**

**Supplementary Tables 1–8**

**Supplementary References 1–26**

**Supplementary Figure 1.** **Schematic diagram of the H-type cell for cyclohexanone-oxime electrosynthesis.**

**Supplementary Figure** **2. Morphology characterization of Ag2O. a**,SEM, **a-c**, TEM and corresponding **d**, EDS mapping images of Ag2O.

**Supplementary Note 1**. Scanning electron microscopy (SEM) and transmission electron microscopy (TEM) images revealed that the synthesized Ag2O exhibited nanoparticle structures with diameters ranging from 150–200 nm. Energy-dispersive spectroscopy (EDS) elemental mapping verified the uniform dispersion of Ag and O in Ag2O.

**Supplementary Figure** **3. Composition characterization of Ag2O. a,** XRD pattern and **b,** Ag 3*d* XPS spectrum of Ag2O.

**Supplementary Figure 4.** **Electroreduction of Ag2O to low-coordination Ag.** **a,** i‒t and **b,** LSV curves of Ag2O electroreduction.

**Supplementary Note 2**. The current density of Ag2O electroreduction decreases and then stabilizes during the 10 min electroreduction at ‒1.8 V vs Ag/AgCl (**Supplementary Figure 4a**). The reduction peak of Ag2O disappears after electroreduction, indicating the reduction of Ag2O to Ag (**Supplementary Figure 4b**).

**Supplementary Figure 5.** **Morphology characterization of low-coordination Ag. a,** SEM, **b,** TEM and **c, d** corresponding EDS mapping images of low-coordination Ag.

**Supplementary Note 3**. SEM and TEM images revealed that the synthesized Ag exhibited nanoparticle structures with diameters ranging from 150–200 nm. The EDS elemental mapping profiles verify that the O content decreases sharply after reduction.

**Supplementary Figure 6.** **Composition characterization of low-coordination Ag. a,** XRD pattern and **b,** Ag 3*d*XPS spectrum of low-coordination Ag.

**Supplementary Note 4. Calculation details**

**Computational details and computational models**

DFT calculations were performed via the Vienna Ab initio Simulation Package (VASP)1‒3. All calculations were conducted at the level of the generalized gradient approximation (GGA)4 with the Perdew-Burke-Ernzerhof5 functional. A kinetic energy cut-off of 450 eV was used in this work. Structural optimizations were performed with residual force and electronic energy differences smaller than 0.01 eV/Å and 10−5 eV, respectively. The structure of Fe metal consists of a close-packed body-centered cubic (110) surface, whereas Co, Ni, Cu, and Ag possess face-centered cubic (111) structures. A four-layer 3×3 supercell was constructed and optimized using a 3×3×1 Monkhorst Pack k-point grid for these metals. In the case of Ag2O-derived Ag nanoparticles with unsaturated coordination, a close-packed fcc (211) surface was utilized to simulate a low coordination step structure. A four-layer 1×2 supercell was constructed and optimized using a 3×2×1 Monkhorst Pack k-point grid for these nanoparticles. Moreover, various Ag-based alloys with doped metal atoms were constructed at the tarrace1 and terrace 2 sites (**Supplementary Figure 8** and **Supplementary Table 4**). The adsorbates were permitted to relax with the two top layer metal atoms, while the two bottom layers were fixed. In addition, a vacuum region of ~15 Å was introduced along the z direction to avoid interactions between images. For all metals, the scheme of Methfessel-Paxton6 (N = 1) was used for a smearing width of 0.2 eV. For the electronic structure calculations, the electronic step convergence criterion was set to 10−7 eV. The transition states were searched via the climbing-image nudged elastic band (CI-NEB) method7,8. The implicit solvation effect was considered via the linear and local solvation model from VASPsol9,10. The selection of the relative permittivity of the medium is made as ϵr = 78.4, which corresponds to the relative permittivity of water. Spin unrestricted calculations were performed in all calculations because NO is paramagnetic.

**Molecule energy calculations**

To calculate the adsorption energies for different adsorbates, the energies of gas-phase NO, H2, and liquid H2O were used as references. The gas phase molecules were corrected by zero-point energy (ZPE), entropy (*S*), and initial energy (*I*), which are taken from work by Jan Rossmeisl11, as shown in **Supplementary Table 1**. The reference energy of H2O (l) was obtained by correcting the DFT–calculated energy of H2O (g) with the Gibbs free energy change between the gas–phase and liquid–phase (equation (1)). Specifically, the formation energies of liquid–phase H2O () and gas–phase H2O () at 298.15 K were –2.458 and –2.369 eV, respectively12.

The Gibbs free energies of molecular NH3, NH2OH, and N2O were calculated via the equilibrium potentials reported in previous work11, as shown in **Supplementary Table 2**.

**Adsorption and desorption energy calculations**

Using gas-phase NO, H2, and liquid H2O as references, the adsorption energies () for each adsorption intermediate were calculated via equation (2).

where is the total energy of adsorbed calculated via DFT. Furthermore, the zero-point energy, entropy, and solvation correction () were considered for the adsorption free energy () calculations (equation (3)).

The ZPE and were calculated with DFT through vibrational analyses via VASPKIT12 under the experimental conditions of 298.15 K. Moreover, the solvent effect was considered via VASPsol9. All correction energies are shown in **Supplementary Table 3**. Moreover, the desorption free energy () is the opposite of .

The solvation energy () of all surfaces is referred to as the Ag slab. The Ag surfaces with and without adsorption intermediates were calculated with VASPsol9, denoted as and . The solvation correction can be further determined via equation (4):

**Adsorption energy analysis for high coverage of NO adsorption**

To explain, in the model of low-coordination Ag, we define that when all low-coordination Ag sites are occupied, the corresponding coverage is 1 ML. The adsorption energy of the nth NO () in Ag was calculated via equation (5) (Ref.13):

where is the total energy of Ag with *n* NO molecules. The atom energy was referenced to gas-phase NO, H2, and liquid H2O, as shown in **Supplementary Note 5.** In addition, is the NO* adsorption energy of the most stable configuration of the NO in the cells.

**Reaction energy calculation**

The CHE model14 was used to consider the reaction energy.

where *U* is the RHE scale. Therefore, for a certain elementary step, the reaction energy change (**∆*G***) can be calculated via equations 8−9.

**Supplementary Table 1. The correction energies for the reference gas molecules used here are taken from the work of Jan Rossmeisl11.**

|  | H2(g) | NO(g) |
| --- | --- | --- |
| ZPE (eV) | 0.28 | 0.089 |
| *TS* (eV) | 0.40 | −0.65 |
| *I* (eV) | 0.09 | 0.00 |

**Supplementary Table 2**. **The equilibrium potential ( vs. RHE) for the electrochemical NO reduction reaction was reported in previous work11.**

| Reactions | (V vs. RHE.) |
| --- | --- |
|  | 1.59 |
|  | 0.71 |
|  | 0.38 |

**Supplementary Table 3.** **Zero-point energies, entropies, and solvation energies of the adsorbed species (*T* = 298.15 K).**

| **Species** | **ZPE (eV)** | ***TS* (eV)** | ***E*sol (eV)** |
| --- | --- | --- | --- |
| NO* | 0.15 | 0.19 | −0.02 |
| NHO* | 0.44 | 0.19 | −0.12 |
| NOH* | 0.44 | 0.16 | −0.17 |
| c-NO−NO* | 0.35 | 0.30 | −0.49 |
| t-NO−NO* | 0.36 | 0.27 | −0.44 |
| c-NO−NOH* | 0.70 | 0.31 | −0.48 |
| t-NO−NOH* | 0.69 | 0.25 | −0.35 |
| c-NO−NHO* | 0.68 | 0.27 | −0.65 |
| t-NO−NHO* | 0.69 | 0.25 | −0.33 |
| c-NOH−NOH* | 1.02 | 0.30 | −0.52 |
| t-NOH−NOH* | 1.00 | 0.29 | −0.35 |
| c-NHO−NHO* | 1.02 | 0.26 | −0.63 |
| t-NHO−NHO* | | 1.01 | 0.36 | −0.56 |
| t-NOH−NHO* | 1.00 | 0.28 | −0.50 |
| N2O* | 0.31 | 0.26 | −0.06 |
| NHOH−NO* | 0.98 | 0.35 | −0.44 |
| NH2O−NO* | 0.92 | 0.43 | −0.42 |
| NHOH* | 0.77 | 0.14 | −0.20 |
| NH2O* | 0.81 | 0.18 | −0.26 |
| NH2OH* | 1.12 | 0.24 | −0.27 |
| O* | 0.06 | 0.05 | −0.18 |
| OH* | 0.33 | 0.09 | −0.06 |

**Supplementary Table** **4.** **The formation energy of metal atoms doped at different sites.** The bold number represents the most stable configuration.

| Species | Step (meV/Å2) | Tarrace1 (meV/Å2) | Tarrace2 (meV/Å2) |
| --- | --- | --- | --- |
| AgRu | 39.96 | **39.30** | 39.33 |
| AgZn | **36.18** | 36.24 | 36.29 |
| AgNi | 37.86 | **37.67** | 37.75 |
| AgCu | 37.06 | **37.04** | 37.06 |

**Supplementary Table** **5.** **The atomic coordinates of the low-coordination Ag are shown as (x, y, z).** The Bader charge of each atom is also provided: positive Bader charges indicate electron accumulation, whereas negative values denote electron depletion.

| Ag | x | y | z | Bader charge |
| --- | --- | --- | --- | --- |
| Ag1 | 2.399 | 0.000 | 2.848 | 0.004 |
| Ag2 | 7.175 | 2.938 | 4.484 | −0.022 |
| Ag3 | 4.823 | 0.000 | 6.225 | −0.025 |
| Ag4 | 2.442 | 2.938 | 7.942 | 0.014 |
| Ag5 | 7.165 | 0.000 | 9.422 | 0.033 |
| Ag6 | 2.399 | 2.938 | 2.848 | 0.004 |
| Ag7 | 7.175 | 0.000 | 4.484 | −0.022 |
| Ag8 | 4.823 | 2.938 | 6.225 | −0.025 |
| Ag9 | 2.442 | 0.000 | 7.942 | 0.014 |
| Ag10 | 7.165 | 2.938 | 9.422 | 0.033 |
| Ag11 | 0.000 | 4.408 | 2.000 | 0.027 |
| Ag12 | 4.798 | 1.469 | 3.696 | 0.017 |
| Ag13 | 2.434 | 4.408 | 5.363 | −0.026 |
| Ag14 | 0.085 | 1.469 | 6.987 | −0.026 |
| Ag15 | 4.805 | 4.408 | 8.733 | 0.004 |
| Ag16 | 0.000 | 1.469 | 2.000 | 0.027 |
| Ag17 | 4.798 | 4.408 | 3.696 | 0.017 |
| Ag18 | 2.434 | 1.469 | 5.363 | −0.026 |
| Ag19 | 0.085 | 4.408 | 6.987 | −0.026 |
| Ag20 | 4.805 | 1.469 | 8.733 | 0.004 |
| Ag21 | 2.399 | 5.877 | 2.848 | 0.004 |
| Ag22 | 7.175 | 8.815 | 4.484 | −0.060 |
| Ag23 | 4.823 | 5.877 | 6.225 | −0.025 |
| Ag24 | 2.442 | 8.815 | 7.942 | 0.014 |
| Ag25 | 7.165 | 5.877 | 9.422 | 0.033 |
| Ag26 | 2.399 | 8.815 | 2.848 | 0.004 |
| Ag27 | 7.175 | 5.877 | 4.484 | 0.017 |
| Ag28 | 4.823 | 8.815 | 6.225 | −0.025 |
| Ag29 | 2.442 | 5.877 | 7.942 | 0.014 |
| Ag30 | 7.165 | 8.815 | 9.422 | 0.033 |
| Ag31 | 0.000 | 10.284 | 2.000 | 0.027 |
| Ag32 | 4.798 | 7.346 | 3.696 | 0.017 |
| Ag33 | 2.434 | 10.284 | 5.363 | −0.026 |
| Ag34 | 0.085 | 7.346 | 6.987 | −0.026 |
| Ag35 | 4.805 | 10.284 | 8.733 | 0.004 |
| Ag36 | 0.000 | 7.346 | 2.000 | 0.027 |
| Ag37 | 4.798 | 10.284 | 3.696 | 0.017 |
| Ag38 | 2.434 | 7.346 | 5.363 | −0.026 |
| Ag39 | 0.085 | 10.284 | 6.987 | −0.026 |
| Ag40 | 4.805 | 7.346 | 8.733 | 0.004 |

**Supplementary Table** **6.** **The atomic coordinates of the low-coordination AgRu are shown as (x, y, z). The Bader charge of each atom is also provided: positive Bader charges indicate electron accumulation, whereas negative values denote electron depletion.**

| AgRu | x | y | z | Bader charge |
| --- | --- | --- | --- | --- |
| Ru1 | 4.848 | 10.287 | 8.517 | −0.051 |
| Ag1 | 2.399 | 0.000 | 2.848 | 0.004 |
| Ag2 | 7.181 | 2.936 | 4.488 | −0.029 |
| Ag3 | 4.833 | 0.015 | 6.189 | −0.013 |
| Ag4 | 2.431 | 2.930 | 7.962 | 0.047 |
| Ag5 | 7.099 | 11.725 | 9.433 | −0.003 |
| Ag6 | 2.399 | 2.938 | 2.848 | 0.010 |
| Ag7 | 0.002 | 0.003 | 4.468 | −0.021 |
| Ag8 | 4.823 | 2.948 | 6.241 | −0.022 |
| Ag9 | 2.445 | 11.728 | 7.972 | −0.008 |
| Ag10 | 7.123 | 2.934 | 9.413 | 0.054 |
| Ag11 | 0.000 | 4.408 | 2.000 | −0.033 |
| Ag12 | 4.798 | 1.469 | 3.696 | 0.012 |
| Ag13 | 2.432 | 4.410 | 5.374 | −0.029 |
| Ag14 | 0.081 | 1.461 | 6.998 | −0.034 |
| Ag15 | 4.777 | 4.410 | 8.743 | 0.034 |
| Ag16 | 0.000 | 1.469 | 2.000 | 0.026 |
| Ag17 | 4.798 | 4.408 | 3.696 | 0.065 |
| Ag18 | 2.431 | 1.472 | 5.384 | −0.026 |
| Ag19 | 0.089 | 4.408 | 6.997 | 0.012 |
| Ag20 | 4.780 | 1.415 | 8.736 | 0.016 |
| Ag21 | 2.399 | 5.877 | 2.848 | 0.055 |
| Ag22 | 0.003 | 8.813 | 4.468 | −0.021 |
| Ag23 | 4.824 | 5.870 | 6.241 | −0.062 |
| Ag24 | 2.445 | 8.843 | 7.972 | 0.039 |
| Ag25 | 7.125 | 5.885 | 9.408 | 0.007 |
| Ag26 | 2.399 | 8.815 | 2.848 | −0.041 |
| Ag27 | 7.181 | 5.880 | 4.488 | −0.030 |
| Ag28 | 4.834 | 8.805 | 6.188 | 0.019 |
| Ag29 | 2.432 | 5.890 | 7.962 | 0.006 |
| Ag30 | 7.100 | 8.851 | 9.431 | 0.049 |
| Ag31 | 0.000 | 10.284 | 2.000 | 0.077 |
| Ag32 | 4.798 | 7.346 | 3.696 | 0.013 |
| Ag33 | 2.431 | 10.287 | 5.385 | −0.040 |
| Ag34 | 0.081 | 7.357 | 6.996 | −0.031 |
| Ag35 | 0.000 | 7.346 | 2.000 | 0.027 |
| Ag36 | 4.798 | 10.284 | 3.696 | −0.028 |
| Ag37 | 2.433 | 7.348 | 5.382 | −0.027 |
| Ag38 | 0.051 | 10.287 | 6.971 | −0.038 |
| Ag39 | 4.782 | 7.405 | 8.735 | 0.018 |

**Supplementary Figure 7.** **The possible reaction pathways of NO reduction and CYC formation.**

**Supplementary Figure 8.** **The possible reaction sites of low-coordination Ag.** **a,** Top and **b,** side views of the optimized model of low-coordination Ag.

**Supplementary Note** **5.** **Supplementary Figure 8a** shows three types of reaction sites: top sites (denoted as T, including T1, T2, and T3), bridge sites (denoted as B, including B1, B2, B3, B4, and B5), and hollow sites (denoted as H, including H1, H2, H3, H4, and H5). **Supplementary Figure 8b** shows three types of metal sites, namely, step edge (gray), terrace 1 (dark blue), and terrace 2 (light blue), with coordination numbers of 7, 10, and 9, respectively. By analysing the coverage-dependent sites, we found that B1 (the step bridge site) and H2 (the hollow site between two terraces and one step atom) are the main reaction sites, as shown in **Figure 4a**.

**Supplementary Figure 9.** **Comparison of the adsorption energies of NOH* and NHO* on low-coordination Ag at NO coverages of 1/4, 1/2 and 3/4 ML.**

Supplementary Figure 10. Comparison of the adsorption energies for NHOH* and NH2O* on low-coordination Ag at NO coverages of 1/4, 1/2 and 3/4 ML.

**Supplementary Figure 11.** **The calculated free energy diagrams for NO reduction at NO coverages of 1/2 ML over low-coordination Ag.**

**Supplementary Table 7 Adsorption energies of intermediates under 1/4, 1/2 and 3/4 ML NO coverage.**

| **intermediates** | **1/4 ML (eV)** | **1/2 ML (eV)** | **3/4 ML (eV)** |
| --- | --- | --- | --- |
| NO* | 0.21 | 0.19 | 0.128 |
| NHO* | ‒0.26 | ‒0.20 | ‒0.21 |
| NH2O* | ‒0.27 | ‒0.95 | ‒1.09 |
| NH2OH* | ‒0.98 | ‒1.24 | ‒1.65 |
| NH2OH | ‒1.14 | ‒1.14 | ‒1.14 |
| O*+NH3 | ‒1.41 | ‒1.16 | ‒1.45 |
| OH*+NH3 | ‒2.81 | ‒3.03 | ‒3.79 |
| H2O+NH3 | ‒3.28 | ‒3.28 | ‒3.28 |

Supplementary Figure 12. Adsorption structures of *NH2O and *NH2OH on low-coordination Ag.

Supplementary Figure 13. Water dissociation energy barriers at 0, 1/4, 1/2 and 3/4 ML NO coverages over low-coordination Ag.

Supplementary Figure 14. Schematic of the reaction mechanism for producing N-2 products.

Supplementary Note 7. Because the NOH* and NHOH* pathways are not prioritized (Supplementary Figures 9 and 10), they are ignored in the reaction network. The coupling of N1 intermediates within three steps of NO hydrogenation is considered (processes 1−7) because further hydrogenation intermediates must involve oxygen to produce N-2. The processes of 1−2 represent the coupling of NO through Langmuir–Hinshelwood (LH, NO* + NO*) and Eley–Rideal (ER, NO + NO*) mechanisms. Similar results were obtained for 3−4 (NO* + NHO* or NO + NHO*) and 6−7 (NO* + NOH* or NO + NOH*). In addition, process 5 represents the coupling of NHO* (NHO* + NHO*). The remaining processes of 8−17 represent hydrogenation processes.

**Supplementary Figure** **15. Comparison of the reaction free energies of d****ifferent N-2 production pathways for low-coordination Ag at 1/4 ML NO.** These basic steps correspond to processes 1−17, as shown in **Supplementary Figure 14**.

**Supplementary Note** **8.** First, NO can couple with N-1 intermediates, including NO*, NHO*, and NH2O*, via LH or ER mechanisms. The coupling of NO* and NH2O* can be excluded because of the weak adsorption of NH2O*. Moreover, the formation of NHO* requires a preliminary reaction step with a reaction energy of −0.149 eV, which is unfavourable for coupling with NO*. Therefore, NO*−NO* is a favourable pathway for N-2 production, which is highlighted with a blue background. Second, the N2O2* product resulting from NO*−NO* coupling tends to form an NO-NOH* intermediate, which is highlighted with a pink background. Third, the NO-NOH* intermediate readily produces an N2O* intermediate, ultimately resulting in N2O, which is highlighted with an orange background.

Supplementary Figure 16. Adsorption free energies of N‒N coupling intermediates (c = cis, t = trans). The corresponding adsorption configurations are shown in Supplementary Figure 17.

Supplementary Figure 17. Configurations of various N‒N coupling intermediates (c = cis, t = trans).

Supplementary Figure 18. In situ IR spectra at a potential of ‒0.8 V vs Ag/AgCl under NO concentrations of 10, 20, 50, 70 and 100%.

**Supplementary Figure 19. Schematic diagram of the gas-fed three-compartment flow cell for CYC electrosynthesis.**

**Supplementary Figure 20.** **LSV curves.** LSV curves of low-coordination Ag with different NO concentrations of **a**, 10, **b**, 20, **c**, 50, **d**, 70 and **e**, 100%**.**

Supplementary Figure 21. The total current density of CYC electrosynthesis with different NO concentrations.

Supplementary Figure 22. The HER partial current density at different NO concentrations.

Supplementary Figure 23. NO reduction current density in the potential range of −1.35 to −9.8 V vs Ag/AgCl for CYC electrosynthesis at 70 and 100% NO concentrations.

**Supplementary Figure 24.** **N-2 product partial current density under different NO concentrations.**

Supplementary Figure 25. NH4+ partial current density at the different NO concentrations.

Supplementary Figure 26. H2 Faradic efficiency under different NO concentrations

Supplementary Figure 27. CYC FE in the potential range of −1.35 to −9.8 V vs Ag/AgCl for CYC electrosynthesis at 70 and 100% NO concentrations.

**Supplementary Figure 28. GC‒MS analysis of the cyclohexanone oxime product.**

**Supplementary Figure 29.** **1H NMR spectrum of the reaction mixture after electroreduction with 50% NO at ‒3.0 V over Ag with maleic acid as the internal standard.**

**Supplementary Note 9.** The product detection tests were carried out after the 200 coulomb (C) reaction. The organic products in the electrolyte were identified and quantified via 1H NMR in water suppression mode. When electrolysis was complete, 0.5 ml of maleic acid aqueous solution (1 M) was first added to the electrolyte, and then 500 µl of the above mixture was mixed with 100 µl of D2O for NMR analysis. The amount of analyte was calculated on the basis of the ratio of the area of the analyte peak (cyclohexanone oxime, ~2.48 ppm, triplet peak, 2H; ~2.14 ppm, triplet peak, 2H; ~1.55 ppm, multiplet peak, 6H) to that of the internal standard (maleic acid, ~5.99 ppm, single peak, 2H). A representative 1H NMR spectrum is shown in **Supplementary Figure 29**.

To verify the accuracy of this quantification method, we configured product standard sample solutions with different concentrations and found that the tested concentration was highly consistent with the actual concentration through the internal standard nuclear magnetic resonance (NMR) quantification method, indicating the accuracy of our quantitative method (**Supplementary Figure 30**).

Gaseous products were detected via GC (Agilent 7890A) and calculated via calibration curves.

The FE is the ratio of the number of electrons transferred for the formation of each product to the total amount of electricity passing through the circuit. The FE for the products was calculated via equation (10):

FE (%) = (10)

The amount of CYC was calculated via equation (11):

(mmol) = (11)

The yield rate was calculated via equation (12):

Yield rate (mmol h−1 cm−1) = (12)

where *F* is the Faraday constant, *Q* is the electric charge, *n* is the number of moles of generated products, *a* is the electron transfer number, *b* is the number of H atoms in the characteristic peak, *t* is the reaction time and *s* is the geometric area of the catalyst.

**Supplementary Figure 30. The calibration curve for CYC in the range of 0.00‒80 mM.**

**Supplementary Figure 31.** **The calibration curve for NH4+ in the range of 0.1‒0.5 ppm.**

**Supplementary Note 10.** NH4+ was detected via a UV–visible spectrometer (Persee, T600) via the colorimetric method15 and quantified via calibration curves (**Supplementary Figure 31**). A certain amount of electrolyte was removed from the electrolytic cell and diluted to 5 mL in the detection range, after which 0.5 mL of sodium salicylate solution (50 g L−1 sodium salicylate, 50 g L−1 potassium sodium tartrate and 20 g L−1 NaOH), 0.05 mL of sodium nitroprusside solution (10 g L−1 sodium nitroprusside) and 0.05 mL of sodium hypochlorite solution (40 ml L−1, 13 wt% NaClO and 30 g L−1 NaOH) were added to the aforementioned solution. After 60 min, the absorption spectrum was measured via a UV–vis spectrophotometer, and the absorbance at a wavelength of 680 nm was recorded. The concentration−absorbance curve was calibrated via a series of standard ammonium chloride solutions (0.1, 0.2, 0.3, 0.4, and 0.5 ppm), and the ammonium chloride crystals were dried at 105 °C for 2 h in advance.

**Supplementary Figure** **32. The product distributions at various NO concentrations and potentials.** Potential dependent product distributions at NO concentrations of **a**, 10, **b**, 20, **c**, 50, **d**, 70 and **e**, 100%.

**Supplementary Figure 33. Adsorption configuration.** Adsorption reorganizations of NO* at NO coverages of **a,** 1/12 ML, **b,** 1/6 ML, **c,** 1/4 ML, **d,** 1/3 ML, and **e,** 5/12 ML.

**Supplementary Note 11.** The coverage-dependent active sites were analysed, as shown in **Figure 4a** and **Supplementary Figure 33**. At 1/12 ML coverage of *NO, one NO molecule tends to be adsorbed at the B1 site, denoted as B1. At 1/6 ML coverage of *NO, two NO molecules are adsorbed. In detail, one NO molecule is adsorbed on the B1 site, whereas the other NO molecule also tends to be adsorbed on B1, which is denoted as B1--B1. Similarly, the most stable configurations for *NO coverage at 1/4 ML, 1/3 ML, and 5/12 ML correspond to sites B1-B1-H2, B1-B1-H2-B1, and B1-B1-H2-B1-H2, respectively.

**Supplementary Figure 34. The functions of the NO adsorption energy and effective *d*-band center under different coverages.** B1: the bridge step site; H2: the hollow site between two terraces and one step atom.

**Supplementary Note 12.** The dots in **Supplementary Figure 34** present the most stable NO adsorption sites at various NO coverages, and more details are shown in **Supplementary Figure 33** and **Supplementary Note 11.** The blue and red dots represent the last adsorbed NO at the H (blue) or B (red) site, respectively. The line segments connect dots with the same coverage. The dot that represents the most stable adsorption site at every coverage is marked with a black circle.

**Supplementary Figure** **35. The full-spectra electrochemical in situ IR.** The full in situ IR spectra under 100% (blue) and 20% (red) NO detected in **a, b**, D2O and **c, d**, H2O.

**Supplementary Figure 36.** **Electrochemical in situ IR spectra.** Potential-dependent electrochemical in situ IR spectra at **a**, 10, **b**, 50, and **c**, 100% NO concentrations.

**Supplementary Figure** **37.** **Bader charge distributions.** Bader charge distributions of low-coordination **a**, AgNi, **b**,AgCu and **c**, AgZn. The doped atoms in Ag are coloured in red and marked by black circles.

**Supplementary Figure 38. Free energy diagram for the coupling of NO on low-coordination AgRu, AgZn, AgCu, and AgNi and Ag at 1/2 ML NO.**

Supplementary Note 13. The synthesis of low-coordination AgRu. The preparation method was based on the reported literature with modifications16. In a typical synthesis, 0.9 mL of 0.05 M RuCl3 and 0.146 mL of allylamine hydrochloride dissolved in 0.957 mL of water were mixed with 7.5 mL of water. A 0.1 mL portion of 0.05 M AgNO3 was added dropwise under constant stirring at 250 rpm, followed by the addition of 0.5 mL of formaldehyde. The solution was mixed for 10 min, transferred to a 25 mL stainless steel autoclave, and heated at 180 °C for 1 h. The ratios of RuCl3 to AgNO3 were adjusted to 2:98, 10:90, and 20:80. After that, the obtained sample was separated by centrifugation, washed with deionized water and ethanol several times and then dried at 45 °C overnight to obtain the AgRuCl precursor, which was further subjected to electroreduction via a method similar to that used for Ag2O electroreduction to obtain the AgRu catalyst. The doped Ru contents are 0.8%, 1.3% and 1.8% (denoted as AgRu-x, where x represents the atomic percentage of Ru), which is quantified via inductively coupled plasma (ICP).

Supplementary Figure 39. Morphology characterization of AgRu-0.8 and AgRu-1.8. SEM, TEM and corresponding EDS mapping images of a–d, AgRu-0.8 and e–h, AgRu-1.8.

**Supplementary Note 14.** SEM and TEM images revealed that the synthesized AgRu catalysts exhibited nanoparticle structures with diameters of 400–500 nm. EDS elemental mapping verified the uniform dispersion of Ru and Ag in AgRu.

Supplementary Figure 40. Composition characterization of AgRu-0.8 and AgRu-1.8. a, XRD patterns and b, Ag 3d XPS spectra of Ag, AgRu-0.8, AgRu-1.3 and AgRu-1.8.

**Supplementary Note 15.** The XRD patterns of AgRu-0.8, AgRu-1.3 and AgRu-1.8 are similar to that of Ag, but the peak shifted slightly to a higher angle (**Supplementary Figure 40a**). The peaks in the Ag 3d XPS spectra of AgRu-0.8, AgRu-1.3 and AgRu-1.8 shifted to lower binding energies with increasing Ru content (**Supplementary Figure 40b**). These results suggest the successful incorporation of Ru into Ag.

**Supplementary Figure 41.** **Potential-dependent electrochemical in situ IR spectra under 100% NO over AgRu-1.3.**

Supplementary Figure 42. LSV curves. The LSV curves recorded a, with and b, without NO over Ag, AgRu-0.8, AgRu-1.3 and AgRu-1.8.

Supplementary Figure 43. Products FE of CYC electrosynthesis over AgRu-x. The product distribution of CYC electrosynthesis at different constant current densities over a, Ag, b, AgRu-0.8, c, AgRu-1.3 and d, AgRu-1.8.

Supplementary Figure 44. CYC electrosynthesis yield rate over AgRu-x. Yield rates of CYC at different constant current densities over a, Ag, b, AgRu-0.8, c, AgRu-1.3 and d, AgRu-1.8.

**Supplementary** **Table 8 Summary of reported cyclohexanone oxime electrosynthesis performance.**

| **Catalyst** | **Electrolyte** | ***j*/mA cm‒2** | **FE/%** | **Ref.** |
| --- | --- | --- | --- | --- |
| This work | 0.9 M NaClO4 + 0.1 M NaOH | 861.2 | 86.1 | —— |
| Al-NFM | 0.1 M KOH | 6.47 | 49.8 | [17] |
| CP/PTFE | 0.25 M Li2SO4 | 8.96 | 44.8 | [18] |
| R-TiO | 0.5 M Na2CO3-NaHCO3 | 20.46 | 68.2 | [19] |
| Zn93Cu7 | 0.5 M KPi | 27.0 | 27.0 | [20] |
| Fe | 0.5 M K2CO3 | 1.35 | 26.9 | [21] |
| Cu/TiO | 1 M NaOH | 29.3 | 54.4 | [22] |
| CuS | 0.5 M PBS | 19.5 | 26.0 | [23] |
| Cu-Mo | 0.5 M KOH + 0.5 M KNO3 | 472.5 | 94.5 | [24] |
| Ag | 0.5 M Na2CO3 | 83.8 | 83.8 | [25] |

**Supplementary Figure 45.** **Synthesis of 15N-pralidoxime. a**, 1H, **b**, 13C and **c**, 15N NMR spectra of 15N-pralidoxime. **1H NMR** (400 MHz, D2O) *δ* [ppm] 8.69 (d, *J*= 8.0 Hz, 0.99H), 8.62 (s, 0.94H), 8.43(t, *J*= 8.0 Hz, 1.00H), 8.32 (d, *J*= 12.0 Hz, 0.94H), 7.92 (t, *J*= 8.0 Hz, 1.00H); **13C NMR** (400 MHz, D2O) *δ* [ppm] 146.37, 145.32, 142.15, 127.62, 126.10(2C), 46.36; **15N NMR** (400 MHz, D2O) *δ* [ppm] 396.49.

**Supplementary Note 15.** The synthesis of 15N-pralidoxime involves two steps. Step 1: 15N-pyridine-2-aldoxime was electrosynthesized with 68% Faradaic efficiency under standard conditions, except for the use of pyridine-2-carboxaldehyde and 15NO as substrates. 15NO was prepared in our lab via a reported method using Na15NO2 (Aladdin)26. Step 2: 0.2 mmol of 15N-pyridine-2-aldoxime was dissolved in 1.5 ml of acetone, and 60 µL of iodomethane was added dropwise. The reaction mixture was heated to 40 °C and stirred for 18 hours. The acetone was subsequently removed, and the yellow powder was washed with ether. A light yellow powder was obtained after vacuum drying. The isolated yield of 15N-pralidoxime was 83%.

Supplementary References

1. Kresse, G. & Furthmüller, J. Efﬁciency of ab-initio total energy calculations for metals and semiconductors using a plane-wave basis set. *Comput. Mater. Sci.* **6**, 15–50 (1996).
2. Kresse, G. & Hafner, J. Ab initio molecular-dynamics simulation of the liquid-metal amorphous-semiconductor transition in germanium. *Phys. Rev. B* **49**, 14251–14269 (1994).
3. Kresse, G. & Furthmüller, J. Efﬁcient iterative schemes for ab initio total-energy calculations using a plane-wave basis set. *Phys. Rev. B* **54**, 11169–11186 (1996).
4. Perdew, J. P., Burke, K. & Ernzerhof, M. Generalized gradient approximation made simple. *Phys. Rev. Lett.* **77**, 3865–3868 (1996).
5. Hammer, B., Hansen, L. B. & Nørskov, J. K. Improved adsorption energetics within density-functional theory using revised Perdew-Burke-Ernzerhof functionals. *Phys. Rev. B* **59**, 7413–7421 (1999).
6. Methfessel, M. & Paxton, A. T. High-precision sampling for Brillouinzone integration in metals. *Phys. Rev. B* **40**, 3616–3621 (1989).
7. Henkelman, G. & Jónsson, H. Improved tangent estimate in the nudged elastic band method for finding minimum energy paths and saddle points. *J. Chem. Phys.***113**, 9978-9985 (2000).
8. Henkelman, G., Uberuaga, B.P. & Jónsson, H. A climbing image nudged elastic band method for finding saddle points and minimum energy paths. *J. Chem. Phys.***113**, 9901-9904 (2000).
9. Mathew, K., Sundararaman, R., Letchworth-Weaver, K., Arias, T. A. & Hennig, R. G. Implicit solvation model for density-functional study of nanocrystal surfaces and reaction pathways. *J. Chem. Phys.* **140**, 084106 (2014).
10. Mathew, K., Kolluru, V. S. C., Mula, S., Steinmann, S. N. & Hennig, R. G. Implicit self-consistent electrolyte model in plane-wave density-functional theory. *J. Chem. Phys.* **151**, 234101 (2019).
11. Wan, H., Bagger, A. & Rossmeisl, J. Electrochemical nitric oxide reduction on metal surfaces. *Angew. Chem. Int. Ed.* **60**, 21966–21972 (2021).
12. Wang, V., Xu, N., Liu, J. C., Tang, G. & Geng, W. T. VASPKIT: A user-friendly interface facilitating high-throughput computing and analysis using VASPs Code, *Comput. Phys. Commun.* **267**, 108033 (2021).
13. Hemmert, T. R., Holstein, B. R., Knöchlein, G. & Scherer, S. Generalized polarizabilities and the chiral structure of the nucleon. *Phys. Rev. Lett.* **79**, 22 (1997).
14. Nørskov, J. K., Rossmeisl, J., Logadottir, A. & Lindqvist, L. Origin of the overpotential for oxygen reduction at a fuel-cell cathode. *J. Phys. Chem. B* **108**,17886−17892 (2004).
15. Yang, K. et al. Unveiling the reaction mechanism of nitrate reduction to ammonia over cobalt-based electrocatalysts. *J. Am. Chem. Soc.* **146**, 19, 12976−12983 (2024).
16. Angell, D. K., Bourgeois, B., Vadai, M. & Dionne, J. A. Lattice-resolution, dynamic imaging of hydrogen absorption into bimetallic AgPd Nanoparticles. *ACS Nano* **16**, 1781−1790 (2022).
17. Zhang, X. *et al.* Direct electro-synthesis of valuable C=N compound from NO. *Chem. Catal.* **2**, 1807−1818 (2022).
18. Wu, Y. *et al.* Electrosynthesis of a nylon-6 precursor from cyclohexanone and nitrite under ambient conditions. *Nat. Commun.* **14**, 3057 (2023).
19. Jia, S. *et al.* Integration of plasma and electrocatalysis to synthesize cyclohexanone oxime under ambient conditions using air as a nitrogen source. *Chem. Sci.* **14**, 13198−13204 (2023).
20. Liao, P., Kang, J., Xiang, R., Wang, S. & Li, G. Electrocatalytic systems for NOx valorization in organonitrogen synthesis. *Angew. Chem. Int. Ed.* **63**, e202311752 (2024).
21. Wu, Y. *et al.* Electrocatalytic synthesis of nylon-6 precursor at almost 100 % yield. *Angew. Chem. Int. Ed.* **62**, e202305491 (2023).
22. Sharp, J. *et al.* Sustainable electrosynthesis of cyclohexanone oxime through nitrate reduction on a Zn–Cu alloy catalyst. *ACS Catal.* **14**, 3287−3297 (2024).
23. Luo, L. *et al.* Electrosynthesis of the nylon-6 precursor from nitrate and cyclohexanone over a rutile TiO2 catalyst. *CCS Chem.* https://doi.org/10.31635/ccschem.024.202403988 (2024).
24. Zhao, R. *et al.* Achieving over 90% faradaic efficiency in cyclohexanone oxime electrosynthesis using the Cu−Mo dual-site catalyst. *J. Am. Chem. Soc.* **146**, 27956−27963 (2024).
25. Zhang, F. *et al.* A Pickering-emulsion-droplet-integrated electrode for the continuous-flow electrosynthesis of oximes. *Nat. Synth* (2025). <https://doi.org/10.1038/s44160-024-00713-3>.
26. Long, J. *et al.* Direct electrochemical ammonia synthesis from nitric oxide. *Angew. Chem. Int. Ed.* **59**, 9711–9718 (2020).
